# Supplementary material for: Boosting the photoelectrochemical water splitting of Fe2O3 by surface-state regulation
Source: Royal Society of Chemistry journal article supplement (doi:10.1039/d3qi02072j), 2023-11-25
Supplement: d3qi02072j1.pdf [file d3qi02072j1.pdf]

## Electronic Supporting Information

### Boosting photoelectrochemical water splitting of Fe<sub>2</sub>O<sub>3</sub> by surface states regulation

Shanshan Jiang<sup>a</sup>, Xinxin Zhang<sup>a</sup>, Madiha Nawaz<sup>a</sup>, Xiaoxing Fan<sup>a, b\*</sup>, Ran Tao<sup>a, b#</sup>

<sup>a</sup> School of Physics, Liaoning University, Shenyang, 110036. P. R. China.

<sup>b</sup> Liaoning Key Laboratory of Semiconductor Light Emitting and Photocatalytic Materials, Liaoning

University, Shenyang 110036, P. R. China.

\*Corresponding author. E-mail address: [xxfan@lnu.edu.cn](mailto:xxfan@lnu.edu.cn)

# Corresponding author. E-mail address: [taoran@lnu.edu.cn](mailto:taoran@lnu.edu.cn)

#### Contents of Supplementary

##### 1. Experimental section

##### 2. The equations

##### 3. Supplementary Figures

##### 4. References

## **1. Experimental section**

### **1.1 Characterization**

The crystal structure of Fe<sub>2</sub>O<sub>3</sub>-based photoanode was characterized using X-ray diffraction (XRD, TD-3500). The morphology and cross-section of the thin films were observed using a scanning electron microscope (FE-SEM, Regulus 8100), and the elements present in the film were further tested using energy dispersive X-ray spectroscopy (EDS, Oxford). X-ray photoelectron spectroscopy (XPS, UIVAC-PHI) measurements of the photoanode film's elemental composition and chemical state were conducted using a PHI 5000 Verse probe. The UV-visible diffuse reflectance spectroscopy (UV-vis DRS) was measured at room temperature using a UV-2600 spectrophotometer (Shimadzu, Japan).

### **1.2 PEC performance test**

The PEC performance was measured on an electrochemical workstation (Princeton Applied Research 2273 model) using a standard three-electrode system. The light intensity was set to 100 mW/cm<sup>2</sup>, equivalent to 1 Sun at AM 1.5G. The standard three-electrode system consisted of Pt as the counter electrode, Ag/AgCl as the reference electrode, and Fe<sub>2</sub>O<sub>3</sub>-based photoelectrodes as the working electrode. The PEC performance was measured in the 1 M NaOH (pH≈13.6) electrolyte. Electrochemical impedance spectroscopy (EIS) measurements was conducted with the frequency ranging from 10 kHz to 0.1 Hz. Gas evolution was analyzed by gas chromatography (GC1690, JieDao) with a three-electrode system.

## 2. The equations

Eq S1 was used to convert Ag/AgCl reference potential into **RHE**<sup>1</sup>:

$$V_{RHE} = V_{Ag/AgCl} + 0.197 + 0.059 pH \quad S1$$

Eq S2 was used to calculate **IPCE**<sup>2</sup>:

$$IPCE = \frac{J \times 1240}{\lambda \times P_{light}} \times 100\% \quad S2$$

Where J is the photocurrent density (mA/cm<sup>2</sup>);  $\lambda$  is the incident light wavelength (nm);

$P_{light}$  is the power density (mW/cm<sup>2</sup>).

Eq S3 was used to calculate **ABPE**<sup>3</sup>:

$$ABPE = \frac{J(1.23 - V_b)}{P} \times 100\%$$

S3

where J is the photocurrent density of samples,  $V_b$  is the applied external potential vs.

RHE and  $P_{light}$  is the power density of the illumination (100 mWcm<sup>-2</sup>).

Eq S4 was used to calculate **The Faraday efficiencies**<sup>4</sup>:

$$H_2(\text{or } O_2) \mu\text{mol.cm}^{-2} = \left( \frac{\text{Area of } H_2(\text{or } O_2) \text{ peak}}{\text{Slope of calibration curve for } H_2(\text{or } O_2)} \right) \times (\text{Head space volume}) \times \left( \frac{1 \text{ mol}}{24.2 \text{ L}} \right)$$

S4

Faradic efficiency=Actual photocurrent density/Theoretical photocurrent density

$$\text{Actual photocurrent density} = N \times nH_2/O_2 \times F \quad S5$$

Where F is the Faraday constant which is 0.096487 C/ $\mu\text{mol}$ .  $nH_2/O_2$  ( $\mu\text{mol}$ ) is amount of H<sub>2</sub> or O<sub>2</sub> evolution determined by gas chromatography. N is number of electrons needed to evolve one molecule of H<sub>2</sub> or O<sub>2</sub>. It is assumed that 2 electrons are needed to produce one molecule of H<sub>2</sub>, and 4 electrons are needed for one molecule of O<sub>2</sub>.

Eq S6 was used to calculate **LHE**<sup>5</sup>:

$$LHE = 1 - 10^{-A(\lambda)} \quad S6$$

where  $A(\lambda)$  is absorbance,  $\lambda$  is wavelength.

Eq S7 was used to calculate **J<sub>abs</sub>**<sup>6</sup>:

$$J_{abs} = \frac{q}{hc} \int_{\lambda}^{\lambda_2} \lambda \phi_{\lambda} \eta_{abs} d\lambda \quad S7$$

Where  $h$  was the Plank constant,  $c$  was the light speed,  $\phi_{\lambda}$  was the photon flux of the AM 1.5G solar spectrum, and  $\eta_{abs}$  was the light absorption efficiency.

Eq S8 was used to calculate  **$\eta_{sep}$** <sup>7</sup>:

$$\eta_{sep} = \frac{J_{Na_2SO_3}}{J_{abs}} \quad S8$$

Where The  $J_{Na_2SO_3}$  was the photocurrent density measured in 1 M KOH and 0.5 M  $Na_2SO_3$  mixed electrolyte, which served as hole scavengers to ensure the hole injection rate approaching 100%.

Eq S9 was used to calculate  **$\eta_{inj}$** <sup>8</sup>:

$$\eta_{inj} = \frac{J_{H_2O}}{J_{Na_2SO_3}}$$

S9

Where  $J_{H_2O}$  was the photocurrent densities measured in 1 M KOH.

Eq S10 was used to calculate  **$N_D$** <sup>9</sup>:

$$\frac{1}{C^2} = \left( \frac{2}{e\epsilon\epsilon_0 N_D A^2} \right) \left( V - V_{fb} - \frac{k_B T}{q} \right) \quad S10$$

Where  $C$  was the space-charge capacitance,  $V$  (V vs. RHE) was the applied voltage,  $V_{fb}$  (V vs. RHE) was the flat-band potential,  $N_D$  was the charge carrier density,  $\epsilon$  was

the dielectric constant of the semiconductor (80 for  $\alpha\text{-Fe}_2\text{O}_3$ ).  $\epsilon_0$  was the vacuum permittivity ( $8.854 \times 10^{-12}$  F/m),  $k_B$  was the Boltzmann constant ( $1.38 \times 10^{-23}$  J K<sup>-1</sup>),  $q$  was the electronic charge ( $1.60 \times 10^{-19}$  C), and  $T$  was the absolute temperature (298K).

Eq S11 was used to calculate  $\tau_e$ <sup>10</sup>:

$$\tau_e = \frac{1}{2\pi f_{max}}$$

S11

Where  $f_{max}$  is the frequency when phase reaches peak.

Eq S12 was used to calculate  $C_{dl}$ <sup>11</sup>:

$$ECSA \propto C_{dl} = \frac{dQ/dt}{dV/dt} = \frac{j(V)}{v}$$

S12

Where  $C_{dl}$  indicates the double-layer electrochemical capacitance,  $j(V)$  is the capacitive current measured at potential  $V$ , and  $v$  is the scan rate.

Eq S13 was used to calculate **DOS**<sup>12</sup>:

$$N_{SS}(E) = \frac{C_{trap}(E)}{q}$$

S13

Where  $N_{SS}(E)$  is the DOS ( $\text{cm}^{-2} \cdot \text{eV}^{-1}$ ) as a function of the applied potential and  $q$  is the electron charge ( $1.602 \times 10^{-19}$  C).

Eq S13 was used to calculate **the proportion of charge transferred** at the photoanode/electrolyte interface<sup>13</sup>:

$$\text{Transfer efficiency}(\%) = \frac{K_{ct}}{K_{ct} + K_{trapping}} = \frac{R_{trapping}}{R_{ct} + R_{trapping}}$$

S14

Where  $K_{ct}$  and  $K_{trapping}$  are the charge transfer and trapping rate constants, respectively,  
and  $R_{ct}$  and  $R_{trapping}$  are the corresponding resistances.

### 3. Supplementary Figures

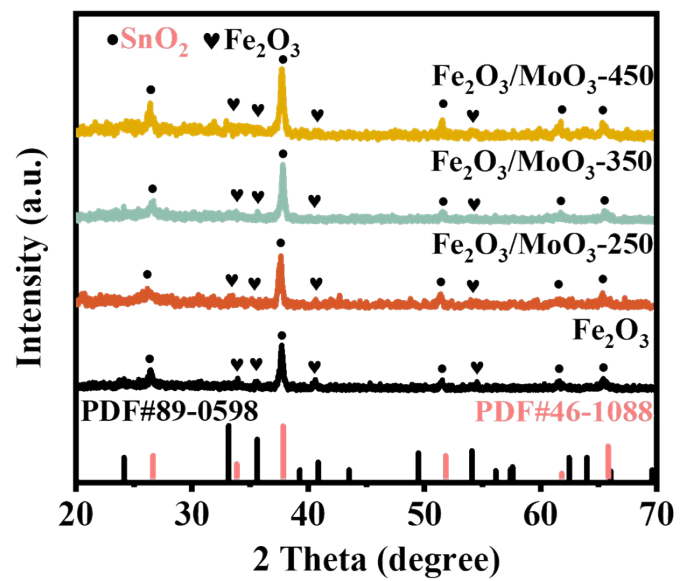

Fig. S1. XRD pattern of Fe<sub>2</sub>O<sub>3</sub>, Fe<sub>2</sub>O<sub>3</sub>/MoO<sub>3</sub>-250, Fe<sub>2</sub>O<sub>3</sub>/MoO<sub>3</sub>-350 and Fe<sub>2</sub>O<sub>3</sub>/MoO<sub>3</sub>-450 films

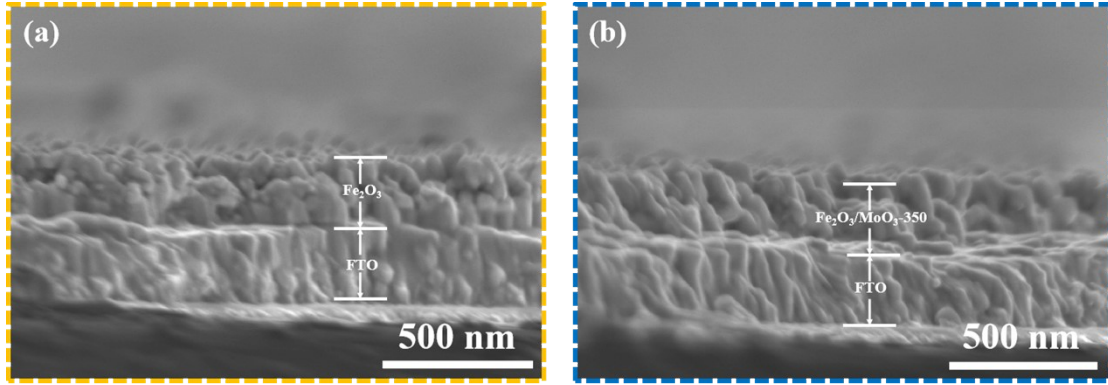

Fig. S2. The cross section images of  $\text{Fe}_2\text{O}_3$  and  $\text{Fe}_2\text{O}_3/\text{MoO}_3\text{-350}$  films.



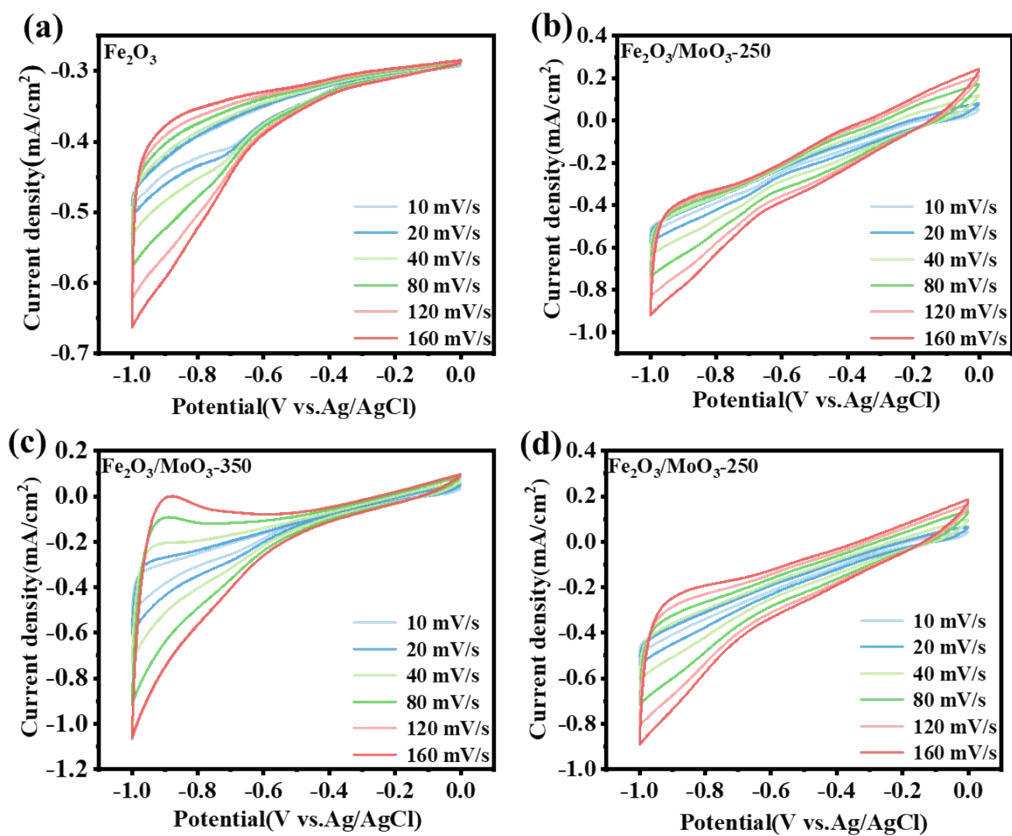

Fig. S3. ECSA of Fe<sub>2</sub>O<sub>3</sub>, Fe<sub>2</sub>O<sub>3</sub>/MoO<sub>3</sub>-250, Fe<sub>2</sub>O<sub>3</sub>/MoO<sub>3</sub>-350 and Fe<sub>2</sub>O<sub>3</sub>/MoO<sub>3</sub>-450 films.

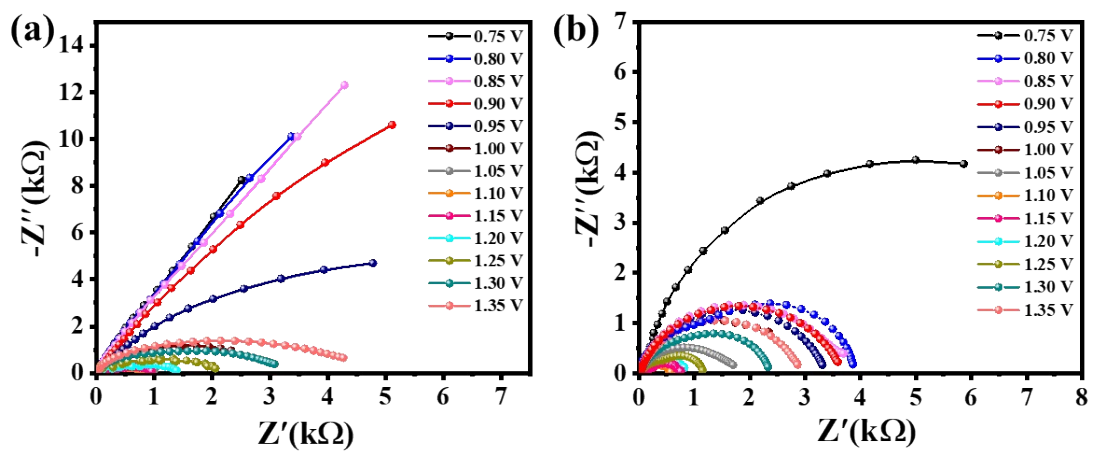

Fig. S4. The PEIS results for (a) Fe<sub>2</sub>O<sub>3</sub> and (b) Fe<sub>2</sub>O<sub>3</sub>/MoO<sub>3</sub>-350 photoanodes at different applied biases under constant light illumination (100 mW/cm<sup>2</sup>).

**Table S1.** Fitting results of EIS measurement

| <b>Samples</b>                                              | <b><math>R_s</math> (<math>\Omega</math>)</b> | <b><math>R_{\text{bulk}}</math> (<math>\Omega</math>)</b> | <b><math>R_{\text{ct}}</math> (<math>\Omega</math>)</b> | <b><math>\tau_e</math> (ms)</b> |
|-------------------------------------------------------------|-----------------------------------------------|-----------------------------------------------------------|---------------------------------------------------------|---------------------------------|
| <b>Fe<sub>2</sub>O<sub>3</sub></b>                          | <b>45.2</b>                                   | <b>109.1</b>                                              | <b>23830</b>                                            | <b>20.1</b>                     |
| <b>Fe<sub>2</sub>O<sub>3</sub>/MoO<sub>3</sub>-<br/>250</b> | <b>41.7</b>                                   | <b>50.8</b>                                               | <b>1974.5</b>                                           | <b>50.4</b>                     |
| <b>Fe<sub>2</sub>O<sub>3</sub>/MoO<sub>3</sub>-<br/>350</b> | <b>39.4</b>                                   | <b>33.9</b>                                               | <b>997.2</b>                                            | <b>52.1</b>                     |
| <b>Fe<sub>2</sub>O<sub>3</sub>/MoO<sub>3</sub>-<br/>450</b> | <b>40.6</b>                                   | <b>73.8</b>                                               | <b>4054.6</b>                                           | <b>31.8</b>                     |

## 4. References

- 1 Y. Zhao, M. Duan, C. Deng, J. Yang, S. Yang, Y. Zhang, H. Sheng, Y. Li, C. Chen and J. Zhao, Br<sup>-</sup>/BrO<sup>-</sup>-mediated highly efficient photoelectrochemical epoxidation of alkenes on  $\alpha$ -Fe<sub>2</sub>O<sub>3</sub>, *Nat. Commun.*, 2023, **14**, 1943-1952.
- 2 B. Jin, Y. Lu, X. Zhang, X. Zhang, D. Li, Q. Liu, B. Deng and H. Li, Iceberg-inspired solar water generator for enhanced thermoelectricity–freshwater synergistic production, *Chem. Eng. J.*, 2023, **469**, 143906.
- 3 J. Zhang, J. Zhang, C. Dong, Y. Xia, L. Jiang, G. Wang, R. Wang and J. Chen, Direct Growth of Polymeric Carbon Nitride Nanosheet Photoanode for Greatly Efficient Photoelectrochemical Water-Splitting, *Small*, 2023, **19**, 2208049.
- 4 S. Li, S. M. Jung, W. Chung, J. W. Seo, H. Kim, S. I. Park, H. C. Lee, J. S. Han, S. B. Ha, I. Y. Kim, S. I. In, J. Y. Kim and J. Yang, Defect engineering of ternary Cu–In–Se quantum dots for boosting photoelectrochemical hydrogen generation, *Carbon Energy*, 2023, **384**, 1-14.
- 5 H. M. Chen, C. K. Chen, R. S. Liu, L. Zhang, J. Zhang and D. P. Wilkinson, Nano-architecture and material designs for water splitting photoelectrodes, *Chem. Soc. Rev.*, 2012, **41**, 5654-5671.
- 6 Y. Wang, Q. Pan, Y. Qiao, X. Wang, D. Deng, F. Zheng, B. Chen and J. Qiu, Layered Metal Oxide Nanosheets with Enhanced Interlayer Space for Electrochemical Deionization, *Adv. Mater.*, 2023, **35**, 2210871.
- 7 M. G. Lee, J. W. Yang, I. J. Park, T. H. Lee, H. Park, W. S. Cheon, S. A. Lee, H. Lee, S. G. Ji, J. M. Suh, J. Moon, J. Y. Kim and H. W. Jang, Tailored BiVO<sub>4</sub>/In<sub>2</sub>O<sub>3</sub> nanostructures with boosted charge separation ability toward unassisted water splitting, *Carbon Energy*, 2023, **321**, 1-15.
- 8 K. Wang, H. Ni, W. Zhao, X. Wu, Y. Hu, G. Xiao and F. Jiang, Highly efficient GeSe micro-air-brick-based thin film standalone solar water-splitting photoelectrode with solar-light-soaking accumulation process, *Energy Environ. Sci.*, 2023, **16**, 1155-1165.
- 9 H.-J. Ahn, K.-Y. Yoon, M. Sung, H. Yoo, H. Ahn, B. H. Lee, J. Lee and J.-H. Jang, Utilizing a Siloxane-Modified Organic Semiconductor for Photoelectrochemical Water Splitting, *ACS Energy Lett.*, 2023, **8**, 2595-2602.
- 10 L. Wang, J. Zhang, Y. Li, Y. Shi, J. Huang, Q. Mei, L. Wang, F. Ding, B. Bai and Q. Wang, Heterostructured CoFe<sub>1.5</sub>Cr<sub>0.5</sub>S<sub>3</sub>O/COFs/BiVO<sub>4</sub> photoanode boosts charge extraction for efficient photoelectrochemical water splitting, *Appl. Catal. B: Environ.*, 2023, **336**, 122921.
- 11 R. Ghosh, B. Papnai, Y. S. Chen, K. Yadav, R. Sankar, Y. P. Hsieh, M. Hofmann and Y. F. Chen, Heterostructured CoFe<sub>1.5</sub>Cr<sub>0.5</sub>S<sub>3</sub>O/COFs/BiVO<sub>4</sub> photoanode boosts charge extraction for efficient photoelectrochemical water splitting, *Adv. Mater.*, 2023, **35**, 2210746.
- 12 H. Zhang, G. She, J. Xu, S. Li, Y. Liu, J. Luo and W. Shi, Electrochemical and photoelectrochemical water oxidation of solvothermally synthesized Zr-doped  $\alpha$ -Fe<sub>2</sub>O<sub>3</sub> nanostructures, *J. Mater. Chem.A*, 2022, **10**, 4952-4959.
- 13 C. Venkata Reddy, I. N. Reddy, B. Akkinapally, K. R. Reddy and J. Shim, Synthesis and photoelectrochemical water oxidation of (Y, Cu) codoped  $\alpha$ -Fe<sub>2</sub>O<sub>3</sub> nanostructure photoanode, *J. Alloys Compd.*, 2020, **814**, 152349.
